# Supplementary material for: Conversion of low-density polyethylene plastic waste into valuable fuels using fly ash as a catalyst
Source: Royal Society of Chemistry journal article supplement (doi:10.1039/d3se00779k), 2023-01-01
Supplement: d3se00779k1.pdf [file d3se00779k1.pdf]

## Supplementary information

### Conversion of low-density polyethylene plastic waste into valuable fuels using fly ash as catalyst

#### 1. Characterization of fly ash

Surface area and pore structures of sample were analyzed by N<sub>2</sub> adsorption/desorption isotherms at 77.3K using a physisorption analyze (quant chrome nova instruments). Moisture and impurities were removed by degassing the ash sample at 120°C for 8 hrs. The Brunauer-Emmett-Teller (BET) theory was used to calculate the specific surface areas. The t-plot method was used to determine the micro pore volume, micro pore, and external surface area. An IR Prestige 21 spectrometer in attenuated total reflection (ATR) mode (Bruker alpha) was used to obtain the FTIR spectra of fly ash sample the spectra were recorded at a range of 500–4000 cm<sup>-1</sup> at a resolution of 8cm<sup>-1</sup> using a combined 64 scans. The Bruker alpha model was used to determine functional group of fly ash. The scanning electron microscope (SEM) (VEGA3 TESCON) was used to identify the surface morphology of the catalyst. Material. Composition of fly ash was determined by EDS technique with SEM.

**Table S1.** GCMS result of oil sample with 5% fly ash (P- 500-FA-5)

| Retention time | Compound name             | formulae                       | Area% |
|----------------|---------------------------|--------------------------------|-------|
| 2.627          | Heptane                   | C <sub>7</sub> H <sub>16</sub> | 0.48  |
| 2.849          | Cyclohexene,4-methyl      | C <sub>7</sub> H <sub>12</sub> | 0.21  |
| 2.912          | Cyclohexane, methyl       | C <sub>7</sub> H <sub>14</sub> | 0.21  |
| 3.069          | Cyclohexene, 4-<br>methyl | C <sub>7</sub> H <sub>12</sub> | 0.32  |
| 3.226          | Cyclopentene, 3-ethyl-    | C <sub>7</sub> H <sub>12</sub> | 0.21  |
| 3.377          | Toluene                   | C <sub>7</sub> H <sub>8</sub>  | 0.89  |
| 3.419          | Cyclohexene, 1-methy      | C <sub>7</sub> H <sub>14</sub> | 0.32  |
| 3.542          | Ethylidenecyclobutane     | C <sub>8</sub> H <sub>12</sub> | 0.16  |
| 3.654          | 1-Octene                  | C <sub>8</sub> H <sub>16</sub> | 1.51  |
| 3.771          | Octane                    | C <sub>8</sub> H <sub>18</sub> | 0.64  |

|               |                     |                |      |
|---------------|---------------------|----------------|------|
| <b>4.694</b>  | Ethylbenzene        | $C_8H_{10}$    | 0.27 |
| <b>4.828</b>  | p-Xylene            | $C_8H_{10}$    | 0.48 |
| <b>4.991</b>  | 1,5-Hexadiene       | $C_6H_{10}$    | 0.24 |
| <b>5.134</b>  | 1-Nonene            | $C_9H_{18}$    | 1.74 |
| <b>5.186</b>  | o-Xylene            | $C_8H_{10}$    | 0.29 |
| <b>5.269</b>  | Nonane              | $C_9H_{20}$    | 0.65 |
| <b>6.612</b>  | 1,9-Decadiene       | $C_{10}H_{18}$ | 0.20 |
| <b>6.751</b>  | 1-Decene            | $C_{10}H_{20}$ | 2.22 |
| <b>6.891</b>  | Decane              | $C_{10}H_{22}$ | 0.64 |
| <b>8.227</b>  | Cycloundecene       | $C_{11}H_{20}$ | 0.30 |
| <b>8.360</b>  | 1-Undecene          | $C_{11}H_{22}$ | 2.14 |
| <b>8.493</b>  | Undecane            | $C_{11}H_{24}$ | 0.80 |
| <b>9.775</b>  | 1,11-Dodecadiene    | $C_{12}H_{22}$ | 0.32 |
| <b>9.898</b>  | 1-Dodecene          | $C_{12}H_{24}$ | 1.85 |
| <b>10.022</b> | Dodecane            | $C_{12}H_{26}$ | 0.79 |
| <b>11.239</b> | 1,13-Tetradecadiene | $C_{13}H_{24}$ | 0.40 |
| <b>11.352</b> | 1-Tridecene         | $C_{13}H_{26}$ | 1.73 |
| <b>11.467</b> | Tridecane           | $C_{13}H_{28}$ | 0.78 |
| <b>12.620</b> | 1-Tridecadien       | $C_{13}H_{24}$ | 0.39 |
| <b>12.725</b> | 2-Tetradecene,      | $C_{14}H_{28}$ | 1.84 |
| <b>12.829</b> | Tetradecane         | $C_{14}H_{30}$ | 0.76 |
| <b>13.925</b> | 1,13-Tetradecadiene | $C_{14}H_{26}$ | 0.33 |
| <b>14.020</b> | Pentadecene         | $C_{15}H_{30}$ | 1.65 |

|               |                     |                |      |
|---------------|---------------------|----------------|------|
| <b>14.115</b> | Pentadecane         | $C_{15}H_{32}$ | 0.75 |
| <b>15.158</b> | 1,13-Tetradecadiene | $C_{14}H_{24}$ | 0.32 |
| <b>15.245</b> | 1-Octadecanol       | $C_{18}H_{38}$ | 1.47 |
| <b>15.331</b> | Hexadecane          | $C_{16}H_{34}$ | 0.79 |
| <b>16.326</b> | Nonadecen-1-ol      | $C_{19}H_{40}$ | 0.29 |
| <b>16.407</b> | Heptadecene         | $C_{17}H_{34}$ | 1.31 |
| <b>16.486</b> | Heptadecane         | $C_{17}H_{36}$ | 0.66 |
| <b>17.438</b> | 1,15-Hexadecadiene  | $C_{16}H_{30}$ | 0.27 |
| <b>17.511</b> | 1-Heptadecene       | $C_{17}H_{34}$ | 1.22 |
| <b>17.583</b> | Octadecane          | $C_{18}H_{38}$ | 0.71 |
| <b>18.496</b> | 1,19-Eicosadiene    | $C_{20}H_{38}$ | 0.27 |
| <b>18.562</b> | 1-Tricosene         | $C_{23}H_{46}$ | 1.16 |
| <b>18.628</b> | Nonadecane          | $C_{19}H_{38}$ | 0.80 |
| <b>19.505</b> | 1,19-Eicosadiene    | $C_{20}H_{38}$ | 0.20 |
| <b>19.565</b> | Nonadecene          | $C_{19}H_{38}$ | 0.98 |
| <b>19.624</b> | Nonadecane          | $C_{19}H_{40}$ | 0.61 |
| <b>20.467</b> | 1,19-Eicosadiene    | $C_{20}H_{38}$ | 0.23 |
| <b>20.522</b> | 1-Tricosene         | $C_{23}H_{46}$ | 0.95 |
| <b>20.576</b> | Heneicosane         | $C_{21}H_{44}$ | 0.79 |
| <b>21.440</b> | 5-Eicosene          | $C_{21}H_{42}$ | 0.86 |
| <b>21.489</b> | Docosane            | $C_{22}H_{44}$ | 0.73 |
| <b>22.319</b> | 1-Tricosene         | $C_{23}H_{46}$ | 0.79 |
| <b>22.363</b> | Heneicosane         | $C_{21}H_{44}$ | 0.71 |

|        |                                         |                                                               |      |
|--------|-----------------------------------------|---------------------------------------------------------------|------|
| 23.163 | 1-Tetracosene                           | C <sub>24</sub> H <sub>48</sub>                               | 0.71 |
| 23.203 | Tetracosane                             | C <sub>24</sub> H <sub>50</sub>                               | 0.69 |
| 23.975 | 9-Tricosene                             | C <sub>23</sub> H <sub>46</sub>                               | 0.64 |
| 24.012 | Octacosane                              | C <sub>28</sub> H <sub>58</sub>                               | 0.64 |
| 24.756 | Hexacosene                              | C <sub>26</sub> H <sub>52</sub>                               | 0.67 |
| 24.789 | Hexaoxane                               | C <sub>26</sub> H <sub>54</sub>                               | 0.65 |
| 25.511 | 1-Docosene                              | C <sub>22</sub> H <sub>44</sub>                               | 0.55 |
| 25.538 | Eicosane, 1-iodo                        | C <sub>20</sub> H <sub>44</sub>                               | 0.62 |
| 26.238 | Eicosyl<br>trifluoroacetate             | C <sub>22</sub> H <sub>41</sub> F <sub>3</sub> O <sub>2</sub> | 0.46 |
| 26.262 | Hexa cosine-1Iodo                       | C <sub>26</sub> H <sub>51</sub> I                             | 0.60 |
| 26.962 | Carbonic acid,<br>octadecyl vinyl ester | C <sub>21</sub> H <sub>40</sub> O <sub>3</sub>                | 0.92 |
| 27.636 | Carbonic acid, eicosyl<br>vinyl ester   | C <sub>23</sub> H <sub>44</sub> O <sub>3</sub>                | 0.80 |
| 28.290 | Carbonic acid, eicosyl<br>vinyl ester   | C <sub>23</sub> H <sub>44</sub> O <sub>3</sub>                | 0.62 |
| 28.947 | 1-Octadecene                            | C <sub>18</sub> H <sub>36</sub>                               | 0.51 |

**Table S2.** GCMS result of oil sample with 10% fly ash ( P- 500-FA-10)

| Retention time | Compound name | Formulae | Area% |
|----------------|---------------|----------|-------|
|----------------|---------------|----------|-------|

|              |                           |                |      |
|--------------|---------------------------|----------------|------|
| <b>2.626</b> | Heptane                   | $C_7H_{16}$    | 0.41 |
| <b>2.849</b> | Cyclohexene,4-methyl      | $C_7H_{12}$    | 0.23 |
| <b>2.911</b> | Cyclohexane, methyl       | $C_7H_{14}$    | 0.21 |
| <b>3.069</b> | Cyclohexene, 3-<br>methyl | $C_7H_{14}$    | 0.41 |
| <b>3.226</b> | Cyclopentene, 3-ethyl-    | $C_7H_{12}$    | 0.24 |
| <b>3.377</b> | Toluene                   | $C_8H_{10}$    | 1.36 |
| <b>3.418</b> | Cyclohexene, 1-methy      | $C_7H_{14}$    | 0.38 |
| <b>3.542</b> | Ethylidenecyclobutane     | $C_8H_{12}$    | 0.21 |
| <b>3.561</b> | 1,3-Cycloheptadiene       | $C_7H_{10}$    | 0.25 |
| <b>3.653</b> | 1-Octene                  | $C_8H_{16}$    | 1.75 |
| <b>3.771</b> | Octane                    | $C_8H_{18}$    | 0.61 |
| <b>4.693</b> | Ethylbenzene              | $C_8H_{10}$    | 0.37 |
| <b>4.828</b> | p-Xylene                  | $C_8H_{10}$    | 0.63 |
| <b>4.991</b> | Octadiene                 | $C_{18}H_{34}$ | 0.29 |
| <b>5.133</b> | Nonene                    | $C_9H_{18}$    | 2.07 |
| <b>5.185</b> | Nonane                    | $C_9H_{20}$    | 0.66 |
| <b>5.480</b> | Cyclohexane, Propyl       | $C_9H_{18}$    | 0.24 |
| <b>6.612</b> | 1,9-Decadiene             | $C_{10}H_{81}$ | 0.24 |
| <b>6.751</b> | 1-Decene                  | $C_{10}H_{20}$ | 2.64 |
| <b>6.891</b> | Decane                    | $C_{10}H_{22}$ | 0.64 |
| <b>8.227</b> | Cycloundecene             | $C_{10}H_{22}$ | 0.37 |

|               |                   |                 |      |
|---------------|-------------------|-----------------|------|
| <b>8.361</b>  | 1-Undecene        | $C_{11}H_{22}$  | 2.57 |
| <b>8.492</b>  | Undecane          | $C_{11}H_{24}$  | 0.83 |
| <b>9.775</b>  | Cyclododecene     | $C_{12}H_{24}$  | 0.40 |
| <b>9.899</b>  | Dodecene          | $C_{12}H_{24}$  | 2.37 |
| <b>11.022</b> | Dodecane          | $C_{12}H_{26}$  | 0.82 |
| <b>11.239</b> | 1,12-Tridecadyne  | $C_{13}H_{24}$  | 0.52 |
| <b>11.354</b> | 1-Tridecene       | $C_{13}H_{26}$  | 2.13 |
| <b>11.467</b> | Tridecane         | $C_{13}H_{28}$  | 0.82 |
| <b>12.621</b> | Tetradecadyne     | $C_{14}H_{26}$  | 0.49 |
| <b>12.725</b> | Tetradecene       | $C_{14}H_{28}$  | 2.22 |
| <b>12.829</b> | Nonadecene        | $C_{19}H_{38}$  | 0.81 |
| <b>13.925</b> | Cyclopentadecanol | $C_{15}H_{30}O$ | 0.41 |
| <b>14.020</b> | 1-Pentadecene     | $C_{15}H_{30}$  | 1.97 |
| <b>14.114</b> | Pentadecane       | $C_{15}H_{32}$  | 0.78 |
| <b>15.158</b> | Hexadecadyne      | $C_{16}H_{34}$  | 0.37 |
| <b>15.245</b> | Nonadecene        | $C_{19}H_{38}$  | 1.70 |
| <b>15.331</b> | Hexadecane        | $C_{16}H_{32}$  | 0.79 |
| <b>16.327</b> | Elcosadiene       | $C_{20}H_{38}$  | 0.33 |
| <b>16.406</b> | 1-Heptadecene     | $C_{17}H_{34}$  | 1.47 |
| <b>16.486</b> | Heptadecane       | $C_{17}H_{36}$  | 0.65 |
| <b>17.438</b> | 1,19-Icosadiene   | $C_{20}H_{38}$  | 0.29 |
| <b>17.511</b> | Octadecene        | $C_{18}H_{36}$  | 1.30 |
| <b>17.581</b> | Octadecane        | $C_{18}H_{38}$  | 0.67 |

|        |                               |                                                               |      |
|--------|-------------------------------|---------------------------------------------------------------|------|
| 18.495 | 18-Nonadecene-1-ol            | C <sub>19</sub> H <sub>38</sub> O                             | 0.29 |
| 18.562 | Nonadecene                    | C <sub>19</sub> H <sub>38</sub>                               | 1.20 |
| 18.627 | Nonadecane                    | C <sub>19</sub> H <sub>40</sub>                               | 0.73 |
| 19.503 | 1-19, Icosadiene              | C <sub>20</sub> H <sub>38</sub>                               | 0.20 |
| 19.564 | 3-IcoScene                    | C <sub>20</sub> H <sub>40</sub>                               | 0.98 |
| 19.623 | Eicosane                      | C <sub>20</sub> H <sub>42</sub>                               | 0.53 |
| 20.467 | 1,19-Eicosadiene              | C <sub>20</sub> H <sub>40</sub>                               | 0.19 |
| 20.522 | Heneicos-1-ene                | C <sub>21</sub> H <sub>42</sub>                               | 0.93 |
| 20.576 | Henecosane                    | C <sub>21</sub> H <sub>44</sub>                               | 0.69 |
| 21.440 | pentacosene                   | C <sub>25</sub> H <sub>50</sub>                               | 0.82 |
| 21.489 | Heneicosane                   | C <sub>21</sub> H <sub>44</sub>                               | 0.62 |
| 22.319 | 1-Tricosene                   | C <sub>23</sub> H <sub>46</sub>                               | 0.74 |
| 22.363 | Octacosane                    | C <sub>28</sub> H <sub>58</sub>                               | 0.60 |
| 23.163 | 1-Tricosene                   | C <sub>23</sub> H <sub>46</sub>                               | 0.66 |
| 23.205 | Tetracosane                   | C <sub>23</sub> H <sub>48</sub>                               | 0.57 |
| 23.975 | Octadecyl<br>trifluoroacetate | C <sub>20</sub> H <sub>37</sub> F <sub>3</sub> O <sub>2</sub> | 0.70 |
| 24.011 | Tertracosane,1-Iodo           | C <sub>24</sub> H <sub>47</sub> I                             | 0.53 |
| 24.757 | 1-Tricosene                   | C <sub>23</sub> H <sub>26</sub>                               | 0.59 |
| 24.789 | Tetracosane,1-iodo            | C <sub>24</sub> H <sub>47</sub> I                             | 0.53 |
| 25.511 | Cyclotetra cosane             | C <sub>24</sub> H <sub>48</sub>                               | 0.49 |
| 25.540 | Hexadecane-1 Iodo             | C <sub>26</sub> H <sub>51</sub> I                             | 0.48 |
| 26.239 | 1-Heptacosanol                | C <sub>27</sub> H <sub>54</sub> O                             | 0.38 |

|        |                                       |                                                |      |
|--------|---------------------------------------|------------------------------------------------|------|
| 26.262 | Heptadecane                           | C <sub>27</sub> H <sub>56</sub>                | 0.48 |
| 26.957 | Eicosane                              | C <sub>20</sub> H <sub>42</sub>                | 0.74 |
| 27.636 | Carbonic acid, eicosyl<br>vinyl ester | C <sub>23</sub> H <sub>44</sub> O <sub>3</sub> | 0.62 |
| 28.287 | Carbonic acid, eicosyl<br>vinyl ester | C <sub>23</sub> H <sub>44</sub> O <sub>3</sub> | 0.49 |
| 28.947 | Carbonic acid, eicosyl<br>vinyl ester | C <sub>23</sub> H <sub>44</sub> O <sub>3</sub> | 0.40 |

**Table S3.** GCMS result of oil sample with 15% fly ash ( P- 500-FA-15)

| Retention time | Compound name              | formulae                       | Area% |
|----------------|----------------------------|--------------------------------|-------|
| 2.626          | Heptane                    | C <sub>7</sub> H <sub>16</sub> | 0.51  |
| 2.849          | Cyclohexene,3-<br>methyl   | C <sub>7</sub> H <sub>14</sub> | 0.26  |
| 2.911          | Cyclohexane, methyl        | C <sub>7</sub> H <sub>14</sub> | 0.23  |
| 3.069          | Cyclohexene, 4-<br>methyl  | C <sub>7</sub> H <sub>12</sub> | 0.46  |
| 3.226          | Cyclopentene, 3-<br>ethyl- | C <sub>7</sub> H <sub>12</sub> | 0.26  |
| 3.376          | Toluene                    | C <sub>7</sub> H <sub>8</sub>  | 1.50  |
| 3.419          | Cyclohexene, 1-<br>methy   | C <sub>7</sub> H <sub>14</sub> | 0.41  |



|        |                     |                                 |      |
|--------|---------------------|---------------------------------|------|
| 3.542  | Cyclooctene         | C <sub>8</sub> H <sub>16</sub>  | 0.22 |
| 3.654  | 1-Octene            | C <sub>8</sub> H <sub>16</sub>  | 1.90 |
| 3.771  | Octane              | C <sub>8</sub> H <sub>18</sub>  | 0.67 |
| 4.693  | Ethylbenzene        | C <sub>8</sub> H <sub>10</sub>  | 0.40 |
| 4.828  | p-Xylene            | C <sub>8</sub> H <sub>10</sub>  | 0.67 |
| 4.991  | 1,8-Nonadiene       | C <sub>9</sub> H <sub>16</sub>  | 0.31 |
| 5.134  | 1-Nonene            | C <sub>9</sub> H <sub>18</sub>  | 2.20 |
| 5.185  | p-Xylene            | C <sub>8</sub> H <sub>10</sub>  | 0.46 |
| 5.269  | Nonane              | C <sub>9</sub> H <sub>18</sub>  | 0.69 |
| 6.612  | 1,9-Decadiene       | C <sub>10</sub> H <sub>18</sub> | 0.33 |
| 6.751  | 1-Decene            | C <sub>10</sub> H <sub>20</sub> | 2.73 |
| 6.891  | Decane              | C <sub>10</sub> H <sub>22</sub> | 0.66 |
| 8.227  | Undecadiene         | C <sub>11</sub> H <sub>20</sub> | 0.38 |
| 8.360  | 1-Undecene          | C <sub>11</sub> H <sub>22</sub> | 2.65 |
| 8.493  | Undecane            | C <sub>11</sub> H <sub>24</sub> | 0.85 |
| 9.775  | 1,11-Dodecadiene    | C <sub>12</sub> H <sub>22</sub> | 0.40 |
| 9.899  | 1-Dodecene          | C <sub>12</sub> H <sub>24</sub> | 2.33 |
| 10.022 | Dodecane            | C <sub>12</sub> H <sub>26</sub> | 0.89 |
| 11.239 | 1,13-Tetradecadiene | C <sub>14</sub> H <sub>26</sub> | 0.49 |
| 11.352 | 1-Tridecene         | C <sub>13</sub> H <sub>26</sub> | 2.10 |
| 11.467 | Tridecane           | C <sub>13</sub> H <sub>28</sub> | 0.80 |
| 12.620 | 1-13 tetradecadien, | C <sub>14</sub> H <sub>26</sub> | 0.47 |
| 12.725 | 2-Tetradecene,      | C <sub>14</sub> H <sub>28</sub> | 2.16 |

|               |                     |                 |      |
|---------------|---------------------|-----------------|------|
| <b>12.829</b> | Tetradecane         | $C_{14}H_{30}$  | 0.79 |
| <b>13.925</b> | 1,13-Tetradecadiene | $C_{14}H_{28}$  | 0.40 |
| <b>14.020</b> | Pentadecene         | $C_{15}H_{30}$  | 1.94 |
| <b>14.115</b> | Pentadecane         | $C_{15}H_{32}$  | 0.77 |
| <b>15.158</b> | 1,13-Tetradecadiene | $C_{14}H_{26}$  | 0.37 |
| <b>15.246</b> | 1-Octadecenel       | $C_{18}H_{36}O$ | 1.69 |
| <b>15.331</b> | Hexadecane          | $C_{16}H_{34}$  | 0.81 |
| <b>16.327</b> | 1,15 hexadecanol    | $C_{16}H_{32}O$ | 0.33 |
| <b>16.407</b> | Heptadecene         | $C_{17}H_{34}$  | 1.49 |
| <b>16.486</b> | Heptadecane         | $C_{17}H_{36}$  | 0.65 |
| <b>17.439</b> | 1,19-EiCosadiene    | $C_{20}H_{38}$  | 0.30 |
| <b>17.511</b> | 1-Nonadecene        | $C_{19}H_{38}$  | 1.34 |
| <b>17.583</b> | Octadecane          | $C_{18}H_{38}$  | 0.69 |
| <b>18.496</b> | 1,19-Eicosadiene    | $C_{20}H_{38}$  | 0.30 |
| <b>18.563</b> | Nonadecene          | $C_{19}H_{38}$  | 1.24 |
| <b>18.628</b> | Nonadecane          | $C_{19}H_{40}$  | 0.80 |
| <b>19.505</b> | 1,19-Eicosadiene    | $C_{20}H_{40}$  | 0.20 |
| <b>19.565</b> | Nonadecene          | $C_{19}H_{38}$  | 1.03 |
| <b>19.626</b> | Eicosane            | $C_{20}H_{42}$  | 0.56 |
| <b>20.467</b> | 1,19-Eicosadiene    | $C_{20}H_{38}$  | 0.23 |
| <b>20.523</b> | Nona decene         | $C_{19}H_{38}$  | 0.98 |
| <b>20.578</b> | Heneicosane         | $C_{21}H_{42}$  | 0.73 |
| <b>21.440</b> | Docosene            | $C_{22}H_{44}$  | 0.86 |

|        |                                      |                      |      |
|--------|--------------------------------------|----------------------|------|
| 21.490 | Docosane                             | $C_{22}H_{46}$       | 0.66 |
| 22.319 | 1-Tricosene                          | $C_{23}H_{46}$       | 0.78 |
| 22.363 | Hexadecane                           | $C_{16}H_{34}$       | 0.64 |
| 23.163 | Henicosanol                          | $C_{21}H_{42}O$      | 0.68 |
| 23.203 | Tetra cosane                         | $C_{24}H_{50}$       | 0.59 |
| 23.975 | Heptadecyl<br>flourobutarate         | $C_{20}H_{33}F_7O_2$ | 0.61 |
| 24.012 | Penta cosane                         | $C_{25}H_{52}$       | 0.57 |
| 24.756 | Hexaoxane                            | $C_{26}H_{54}$       | 0.59 |
| 24.757 | Hexacosene                           | $C_{26}H_{52}$       | .59  |
| 24.789 | Eicosane -1 Iodo                     | $C_{20}H_{39}I$      | 0.54 |
| 25.511 | Hexacosene                           | $C_{26}H_{52}$       | 0.49 |
| 25.538 | Hexadecane-1Iodo                     | $C_{16}H_{31}I$      | 0.53 |
| 26.238 | Eicosyl<br>trifluoroacetate          | $C_{22}H_{41}F_3O_2$ | 0.46 |
| 26.262 | Eicosane                             | $C_{20}H_{42}$       | 0.91 |
| 26.962 | Heptadecene                          | $C_{17}H_{34}$       | 0.77 |
| 27.636 | Eicosane                             | $C_{20}H_{42}$       | 0.62 |
| 28.292 | Carbonic acid<br>Eicosyl vinyl ester | $C_{23}H_{44}O_3$    | 0.51 |

**-Table S4.** GCMS result of oil sample with 20% fly ash ( P- 500-FA-20)

| <b>Retention time</b> | <b>Compound name</b>      | <b>Formulae</b>                 | <b>Area %</b> |
|-----------------------|---------------------------|---------------------------------|---------------|
| 2.627                 | Heptane                   | C <sub>7</sub> H <sub>16</sub>  | 0.70          |
| 2.848                 | Cyclohexene,3<br>methyl   | C <sub>8</sub> H <sub>12</sub>  | 0.22          |
| 2.912                 | Cyclohexane, methyl       | C <sub>7</sub> H <sub>14</sub>  | 0.25          |
| 3.069                 | Cyclohexene, 3-<br>methyl | C <sub>7</sub> H <sub>16</sub>  | 0.28          |
| 3.226                 | Cyclopentene, 3-<br>ethyl | C <sub>7</sub> H <sub>12</sub>  | 0.21          |
| 3.376                 | Toluene                   | C <sub>7</sub> H <sub>8</sub>   | 0.47          |
| 3.418                 | Cyclohexene, 1-<br>methyl | C <sub>7</sub> H <sub>14</sub>  | 0.36          |
| 3.653                 | 1-Octene                  | C <sub>8</sub> H <sub>16</sub>  | 1.59          |
| 3.770                 | Octane                    | C <sub>8</sub> H <sub>18</sub>  | 0.85          |
| 4.825                 | p-Xylene                  | C <sub>8</sub> H <sub>10</sub>  | 0.40          |
| 5.132                 | 1-Nonen                   | C <sub>9</sub> H <sub>18</sub>  | 1.89          |
| 5.268                 | Nonane                    | C <sub>9</sub> H <sub>20</sub>  | 0.88          |
| 6.611                 | 1,9-Decadiene             | C <sub>10</sub> H <sub>18</sub> | 0.17          |
| 6.750                 | 1-Decene                  | C <sub>10</sub> H <sub>20</sub> | 2.45          |
| 6.890                 | Decane                    | C <sub>10</sub> H <sub>22</sub> | 0.91          |
| 8.226                 | 1,10-Undecadiene          | C <sub>11</sub> H <sub>20</sub> | 0.26          |
| 8.359                 | 5-Undecene                | C <sub>11</sub> H <sub>22</sub> | 2.36          |
| 8.492                 | Undecane                  | C <sub>11</sub> H <sub>24</sub> | 1.11          |

|               |                      |                 |      |
|---------------|----------------------|-----------------|------|
| <b>9.774</b>  | Cyclododecene        | $C_{11}H_{20}$  | 0.31 |
| <b>9.897</b>  | 1-Dodecene           | $C_{12}H_{24}$  | 2.12 |
| <b>10.021</b> | Dodecane             | $C_{12}H_{26}$  | 1.14 |
| <b>11.237</b> | Cyclododecene        | $C_{12}H_{24}$  | 0.38 |
| <b>11.351</b> | 1-Tridecene          | $C_{13}H_{26}$  | 2.00 |
| <b>11.465</b> | Tridecane            | $C_{13}H_{28}$  | 1.10 |
| <b>12.620</b> | 1,13-Tetradecadiene  | $C_{14}H_{26}$  | 0.36 |
| <b>12.724</b> | 2-Tetradecene        | $C_{14}H_{28}$  | 2.09 |
| <b>12.828</b> | Tetradecane          | $C_{14}H_{30}$  | 1.09 |
| <b>13.924</b> | 1,12-Tridecadiene    | $C_{13}H_{24}$  | 0.30 |
| <b>14.019</b> | 1-Pentadecene        | $C_{15}H_{30}$  | 1.85 |
| <b>14.114</b> | Pentadecane          | $C_{15}H_{32}$  | 1.08 |
| <b>15.157</b> | 1,15-Pentadecanediol | $C_{15}H_{32}O$ | 0.28 |
| <b>15.244</b> | 7-Hexadecene         | $C_{16}H_{32}$  | 1.64 |
| <b>15.331</b> | Hexadecane           | $C_{16}H_{34}$  | 1.12 |
| <b>16.326</b> | 1,19-Eicosadiene     | $C_{20}H_{38}$  | 0.25 |
| <b>16.406</b> | 1-Heptadecene        | $C_{17}H_{34}$  | 1.42 |
| <b>16.486</b> | Heptadecane          | $C_{17}H_{36}$  | 0.94 |
| <b>17.437</b> | 1,19-Eicosadiene     | $C_{20}H_{40}$  | 0.21 |
| <b>17.511</b> | 1-Nonadecene         | $C_{19}H_{38}$  | 1.30 |
| <b>17.582</b> | Tetradecane          | $C_{18}H_{38}$  | 0.97 |
| <b>18.562</b> | 1-Nonadecene         | $C_{19}H_{38}$  | 1.20 |
| <b>18.628</b> | Nonadecane           | $C_{19}H_{40}$  | 1.07 |

|        |                                       |                                                  |      |
|--------|---------------------------------------|--------------------------------------------------|------|
| 19.565 | 5-Eicosene                            | C <sub>20</sub> H <sub>40</sub>                  | 0.98 |
| 19.625 | Eicosane                              | C <sub>20</sub> H <sub>42</sub>                  | 0.82 |
| 20.522 | Henicos-1-ene                         | C <sub>21</sub> H <sub>42</sub>                  | 0.93 |
| 20.578 | Hen eicosane                          | C <sub>21</sub> H <sub>44</sub>                  | 1.03 |
| 21.441 | 5-Eicosene,                           | C <sub>20</sub> H <sub>40</sub>                  | 0.80 |
| 21.490 | Docosane                              | C <sub>22</sub> H <sub>46</sub>                  | 0.94 |
| 22.319 | 1-Tricosene                           | C <sub>23</sub> H <sub>46</sub>                  | 0.72 |
| 22.364 | TTetradecane,4 ethyl                  | C <sub>16</sub> H <sub>34</sub>                  | 0.90 |
| 23.164 | 3-Eicosene                            | C <sub>20</sub> H <sub>40</sub>                  | 0.64 |
| 23.205 | Eicosane                              | C <sub>20</sub> H <sub>42</sub>                  | 0.87 |
| 23.976 | 1-Heneicosanol                        | C <sub>21</sub> H <sub>42</sub> O                | 0.62 |
| 24.013 | Tetradecane, 1-iodo                   | C <sub>14</sub> H <sub>29</sub> I                | 0.80 |
| 24.759 | Tricosene                             | C <sub>23</sub> H <sub>46</sub>                  | 0.54 |
| 24.791 | Hexa decane- Iodo-                    | C <sub>16</sub> H <sub>31</sub> I                | 0.78 |
| 25.514 | Heptacos-1-ene                        | C <sub>27</sub> H <sub>54</sub>                  | 0.41 |
| 25.539 | Hexadecane-1Iodo                      | C <sub>16</sub> H <sub>31</sub> I                | 0.75 |
| 26.264 | Eicosane                              | C <sub>20</sub> H <sub>42</sub>                  | 1.06 |
| 27.640 | Sulfurous acid, butyl<br>heptadecyl.  | C <sub>21</sub> H <sub>44</sub> O <sub>3</sub> S | 0.78 |
| 28.295 | Eicosane                              | C <sub>20</sub> H <sub>42</sub>                  | 0.61 |
| 28.951 | Carbonic acid,<br>eicosyl vinyl ester | C <sub>23</sub> H <sub>44</sub> O <sub>3</sub>   | 0.49 |

NMR results of Pyrolysis oil of waste plastic with 20% fly ash catalyst.

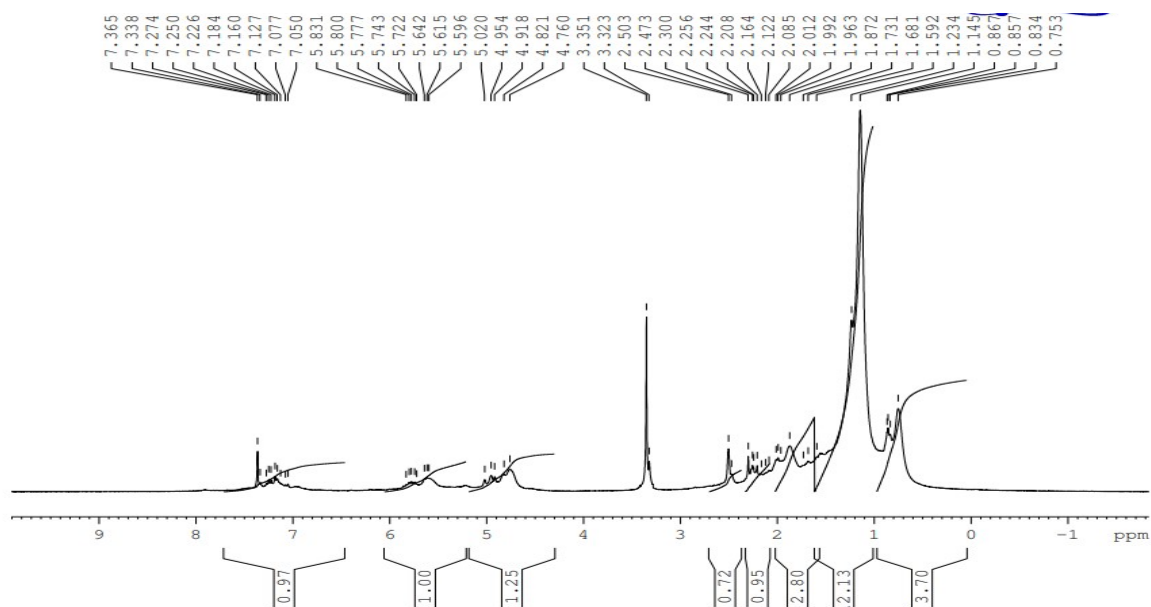

**Figure S1**  $^1\text{H}$  NMR analyses of liquid product with 20% fly ash samples

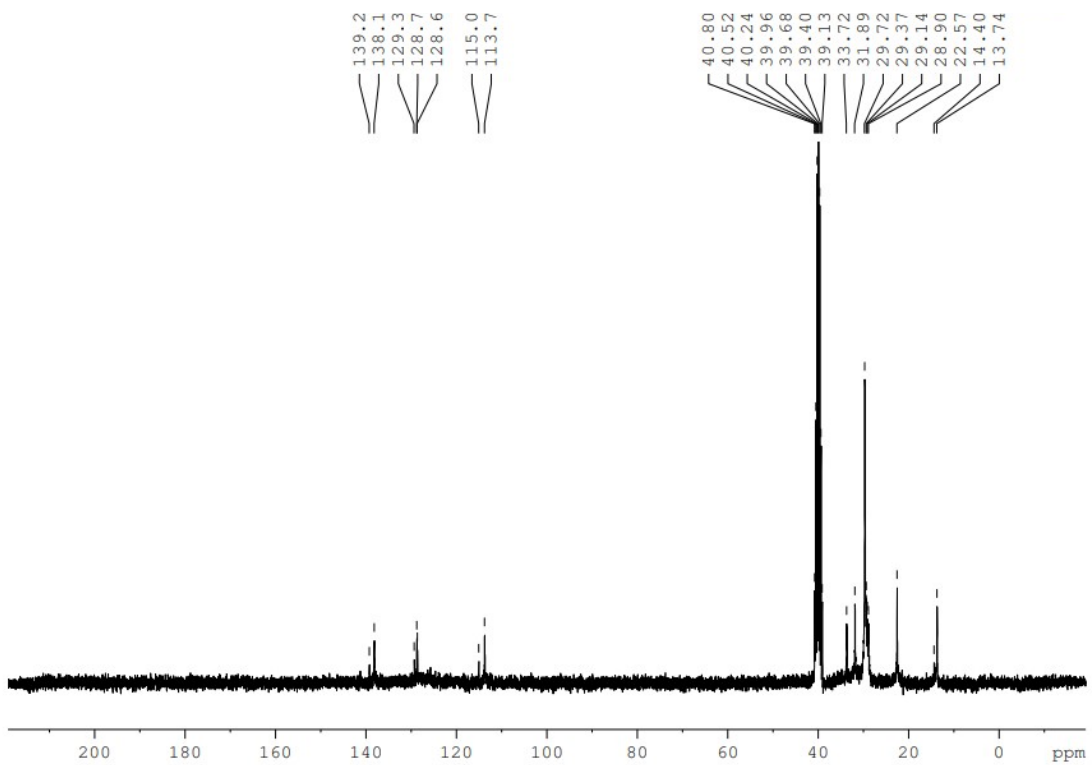

**Figure S2.**  $^{13}\text{C}$  NMR analyses of liquid product with 20% fly ash samples
